# Supplementary material for: Pentamethylquercetin induces adipose browning and exerts beneficial effects in 3T3-L1 adipocytes and high-fat diet-fed mice
Source: Springer Nature journal article supplement (doi:10.1038/s41598-017-01206-4), 2017-04-19
Supplement: 41598_2017_1206_MOESM1_ESM.pdf [file 41598_2017_1206_MOESM1_ESM.pdf]

## Pentamethylquercetin induces adipose browning and exerts beneficial effects in 3T3-L1 adipocytes and high-fat diet-fed mice

Yi Han, Jian-Zhao Wu, Ji-zhong Shen, Lei Chen, Ting He, Man-wen Jin, Hui Liu

### Supplementary materials

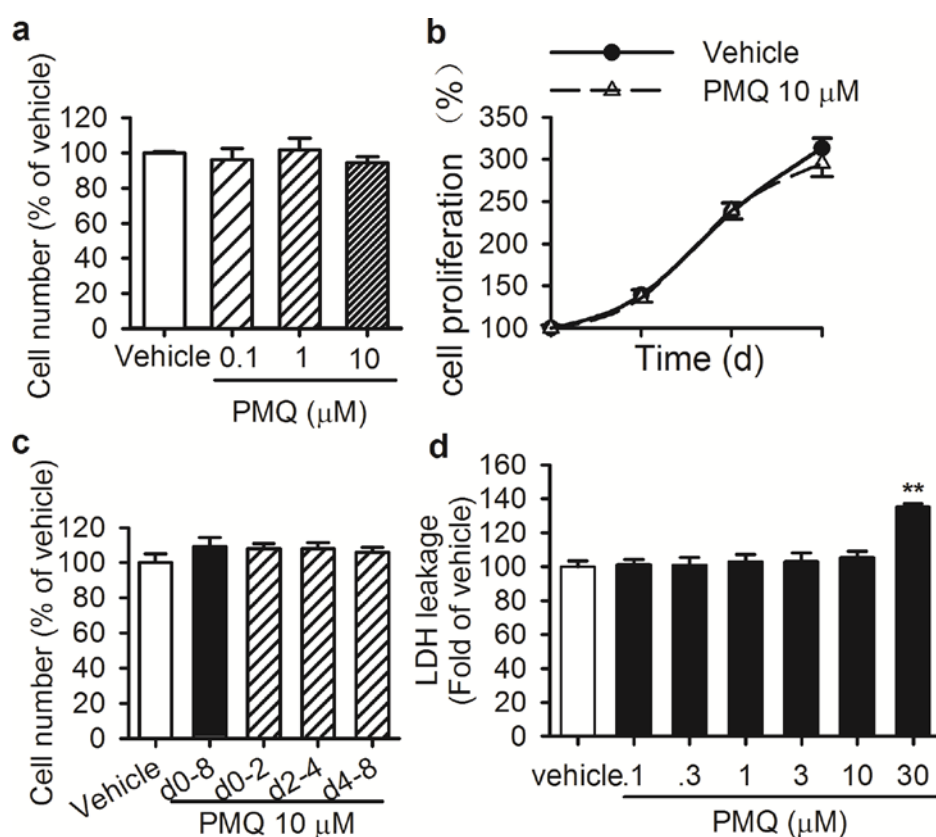

**Figure S1. Effects of PMQ on cell viability in 3T3-L1 adipocytes.** (a) 3T3-L1 preadipocytes were treated with PMQ at concentrations of 0.1, 1 and 10  $\mu\text{M}$  for 72 h. (b) 3T3-L1 preadipocytes were incubated with 10  $\mu\text{M}$  PMQ for 24, 48, 72 h. (c) During the indicated periods (Days 0-8, 0-2, 2-4, 4-8) of 3T3-L1 adipocyte differentiation, the cells were exposed to 10  $\mu\text{M}$  PMQ. Cell proliferation was evaluated by MTT assay on day 8. (d) 3T3-L1 preadipocytes were treated with PMQ at concentrations of 0.1, 0.3, 1, 3, 10 and 30  $\mu\text{M}$  for 72 h. Cell toxicity was evaluated by LDH release assay. The data are expressed as the mean  $\pm$  SEM.  $n=3$  experiments, \*\* $p<0.01$  vs vehicle.

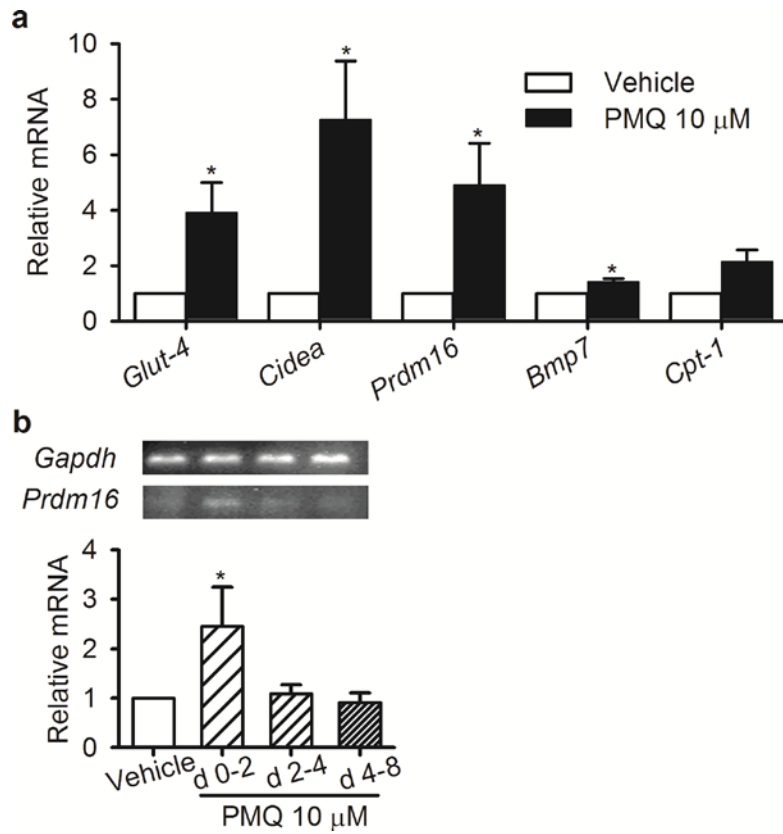

**Figure S2. Effects of PMQ on related genes in 3T3-L1 adipocytes.** (a) qPCR analysis of the mRNA levels of the following genes in 3T3-L1 adipocytes: *Glut-4*, *Cidea*, *Prdm16*, *Bmp7* and *Cpt-1*. (b) The relative mRNA levels of *Prdm16*. The data are expressed as the mean  $\pm$  SEM.  $n=3$  experiments,  $*p<0.05$  vs vehicle.

|               | Time for cells treated<br>with PMQ | Time for cells treated<br>with DMSO       |
|---------------|------------------------------------|-------------------------------------------|
| Group Vehicle | –                                  | Days 0-8 (a total of 8 days)              |
| Group d0-8    | Days 0-8 (a total of 8 days)       | –                                         |
| Group d0-2    | Days 0-2 (a total of 2 days)       | Days 2-8 (a total of 6 days)              |
| Group d2-4    | Days 2-4 (a total of 2 days)       | Days 0-2 and Days 4-8 (a total of 6 days) |
| Group d4-8    | Days 4-8 (a total of 4 days)       | Days 0-4 (a total of 4 days)              |

**Table S1 Time protocol for 3T3-L1 adipocytes in stage-specific experiments**

|               | Reverse                   | Forwad                 |
|---------------|---------------------------|------------------------|
| <i>Gapdh</i>  | TGATGTTAGTGGGGTCTCGCTC    | GACAAAATGGTGAAGGTCGGTG |
| <i>Ucp1</i>   | TCGCACAGCTTGGTACGCTT      | TACACGGGGACCTACAATGCT  |
| <i>C/ebpa</i> | CAGTTCACGGCTCAGCTGTT      | AAAGCCAAGAAGTCGGTGGA   |
| <i>Pgc-1α</i> | TTCGCAGGCTCATTGTTGTACTGGT | GGAGCTGGATGGCTTGGGACAT |
| <i>Pparγ</i>  | CAATCGGATGGTTCTTCGGA      | ACTGCCTATGAGCACTTCAC   |
| <i>Prdm16</i> | AGGAACACGCTACACGGATG      | ACTTTGGATGGGAGAGATGCTG |

**Table S2 Mouse gene-specific primers for RT-PCR**

|                | Forward               | Reverse                |
|----------------|-----------------------|------------------------|
| <i>β-actin</i> | CTGAGAGGGAAATCGTGCGT  | CCACAGGATTCCATACCCAAGA |
| <i>Ucp1</i>    | ACGGGGACCTACAATGCTTAC | CAGCTTGGTACGCTTGGGTAC  |
| <i>C/ebpa</i>  | GCATCTGCGAGCACGAGA    | CCGGGTAGTCAAAGTCACCG   |
| <i>Pgc-1α</i>  | TGTTCCCGATCACCATATTCC | AGCTGTCGTACCTGGGCCTAC  |
| <i>Cidea</i>   | CGTGGTGGACACAGAGGAGTT | CATTGAGACAGCCGAGGAAGT  |
| <i>Bmp7</i>    | TGGACCCCAGAACAAGCAA   | CCCTCACAGTAGTAGGCAGCAT |
| <i>Glut-4</i>  | GCCCCATTCCCTGGTTCA    | GGACCCATAGCATCCGCAA    |
| <i>Cpt-1</i>   | TATCGCCACCTGCTGAACC   | TTGAAGGTGACGAAGGTGGT   |

**Table S3 Mouse gene-specific primers for Q-PCR**
